# Supplementary material for: Genome Scale Analysis Reveals IscR Directly and Indirectly Regulates Virulence Factor Genes in Pathogenic Yersinia
Source: PubMed Central journal article supplement (PMC8262890; doi:10.1128/mbio.00633-21), 2021-06-01
Supplement: mbio.00633-21-sf001.pdf [file mbio.00633-21-sf001.pdf]

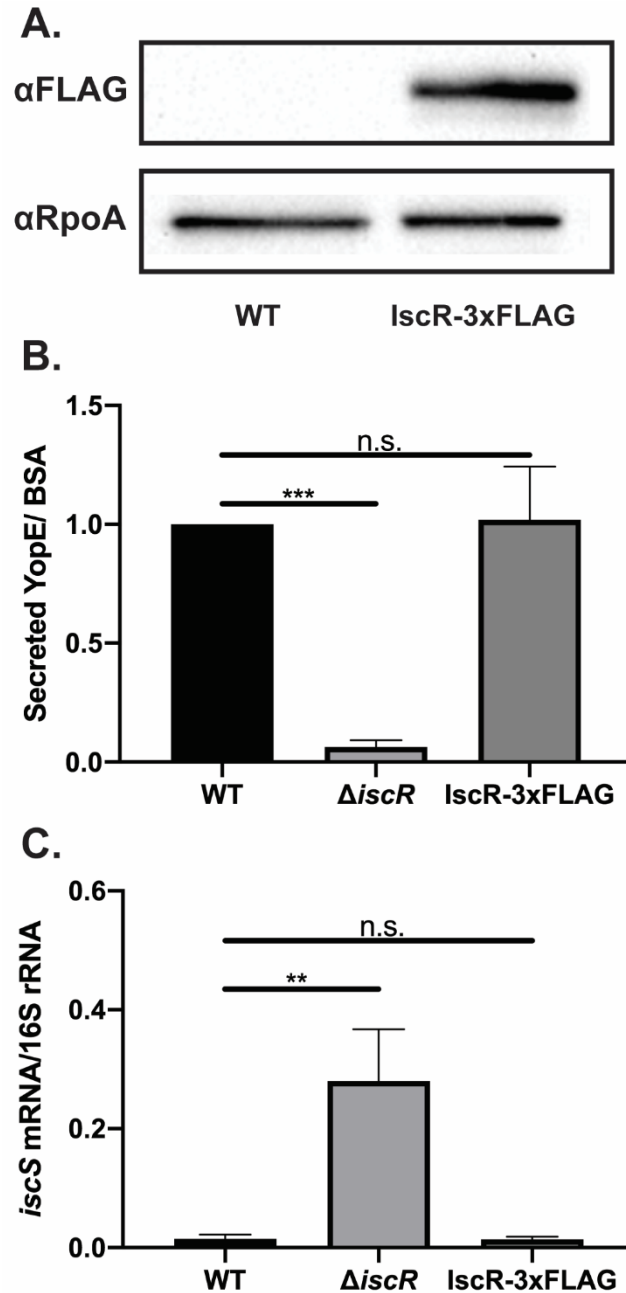

**Figure S1. 3xFLAG-tagged IscR rescues an *iscR* deletion.** (A) Whole cell extracts from WT *Y. pseudotuberculosis* or a strain harboring a chromosomally-encoded 3xFLAG tagged IscR were visualized using anti-FLAG or anti-RpoA antibodies. (B) To measure the relative efficiency of the Ysc T3SS, *Yersinia* strains were grown under T3SS-inducing conditions and secreted proteins precipitated by trichloroacetic acid were visualized using Coomassie blue. Relative amounts of the T3SS effector protein YopE were quantified by densitometry compared to a spiked in BSA protein control. The average of three biological replicates  $\pm$  standard deviation is shown. (C) *Yersinia* strains were grown under T3SS inducing conditions and relative *iscS* mRNA levels evaluated by qPCR and normalized to 16s rRNA. The average of three biological replicates  $\pm$  standard deviation is shown. \*\*\* $p$ <0.001; \*\* $p$ <0.01; n.s. non-significant (one-way ANOVA with Dunnett's *post-hoc* test).
