# Supplementary material for: Genome Scale Analysis Reveals IscR Directly and Indirectly Regulates Virulence Factor Genes in Pathogenic Yersinia
Source: PubMed Central journal article supplement (PMC8262890; doi:10.1128/mbio.00633-21), 2021-06-01
Supplement: mbio.00633-21-sf005.pdf [file mbio.00633-21-sf005.pdf]

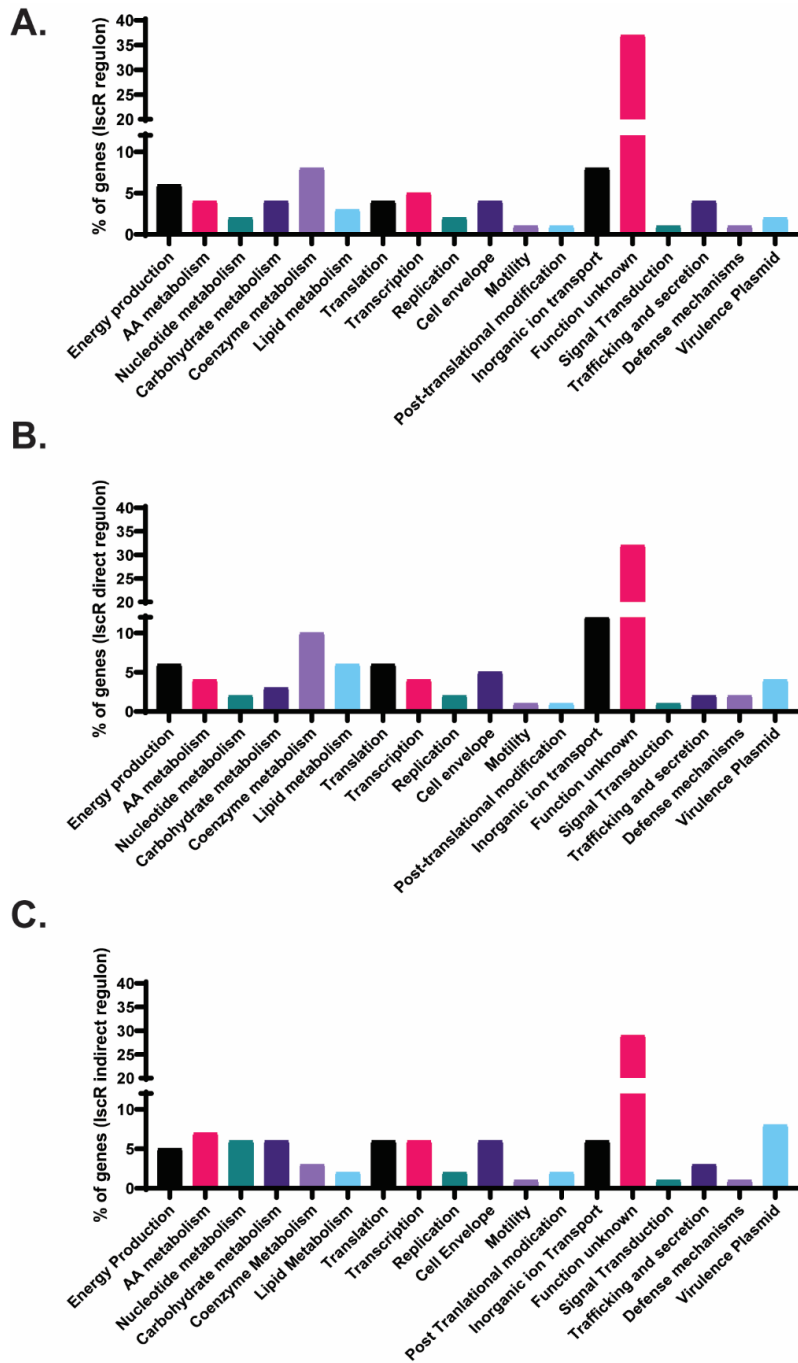

**Figure S5. COG analysis of the IscR regulon, functional regulon, and indirect regulon.** Clusters of Orthologous Groups of proteins (COG) analysis of genes with a IscR ChIP-Seq peak (A), genes with a IscR ChIP-Seq peak and are differentially expressed between WT and the *iscR* mutant under at least one tested condition (B), and genes differentially expressed between WT and the *iscR* mutant but have no IscR ChIP-Seq peak (C).
