# Supplementary material for: Genome Scale Analysis Reveals IscR Directly and Indirectly Regulates Virulence Factor Genes in Pathogenic Yersinia
Source: PubMed Central journal article supplement (PMC8262890; doi:10.1128/mbio.00633-21), 2021-06-01
Supplement: mbio.00633-21-sf006.pdf [file mbio.00633-21-sf006.pdf]

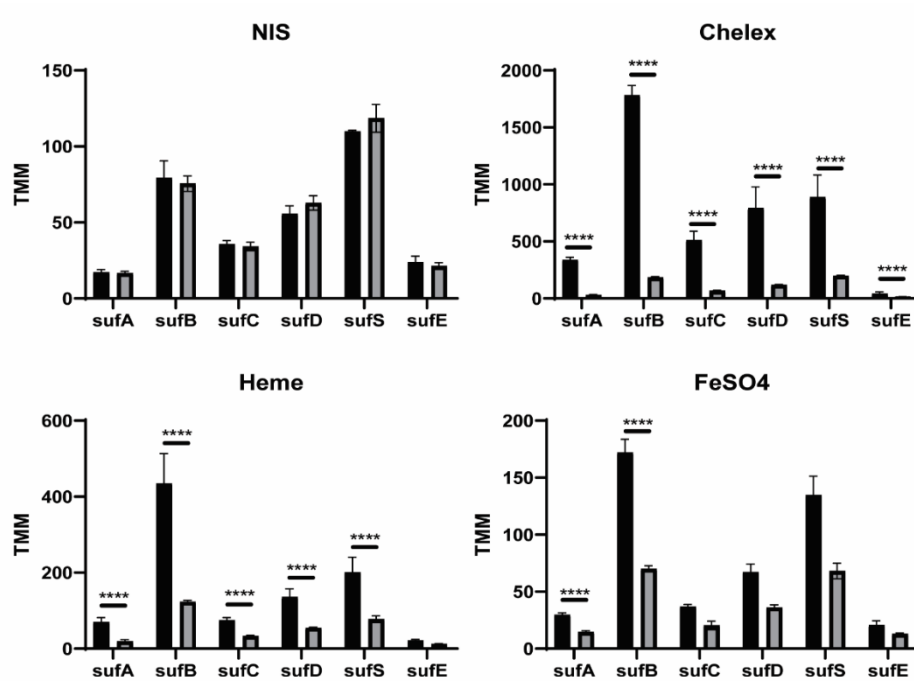

**Figure S6. Expression of the *suf* operon is modulated by iron and requires *IscR* .** Expression of *sufA*, *sufB*, *sufC*, *sufD*, *sufS*, and *sufE* genes under varying iron conditions as measured by RNA-seq. Reads are represented by Trimmed Mean of M-values (TMM) of WT (black) and  $\Delta$ *iscR* strains (grey) grown in M9 minimal media containing 3.6  $\mu$ M FeSO<sub>4</sub> (non-iron starved, NIS), iron starved in chelex-treated M9 minimal media with no iron source added back (Chelex), supplemented with 5 mM hemin (+Heme), or supplemented with 3.6  $\mu$ M FeSO<sub>4</sub> (+FeSO<sub>4</sub>). \*\* $p < 0.01$ ; \*\*\* $p < 0.001$ ; \*\*\*\* $p < 0.0001$  (EdgeR with a corrected FDR post-hoc test).
