# Supplementary material for: Genome Scale Analysis Reveals IscR Directly and Indirectly Regulates Virulence Factor Genes in Pathogenic Yersinia
Source: PubMed Central journal article supplement (PMC8262890; doi:10.1128/mbio.00633-21), 2021-06-01
Supplement: mbio.00633-21-sf007.pdf [file mbio.00633-21-sf007.pdf]

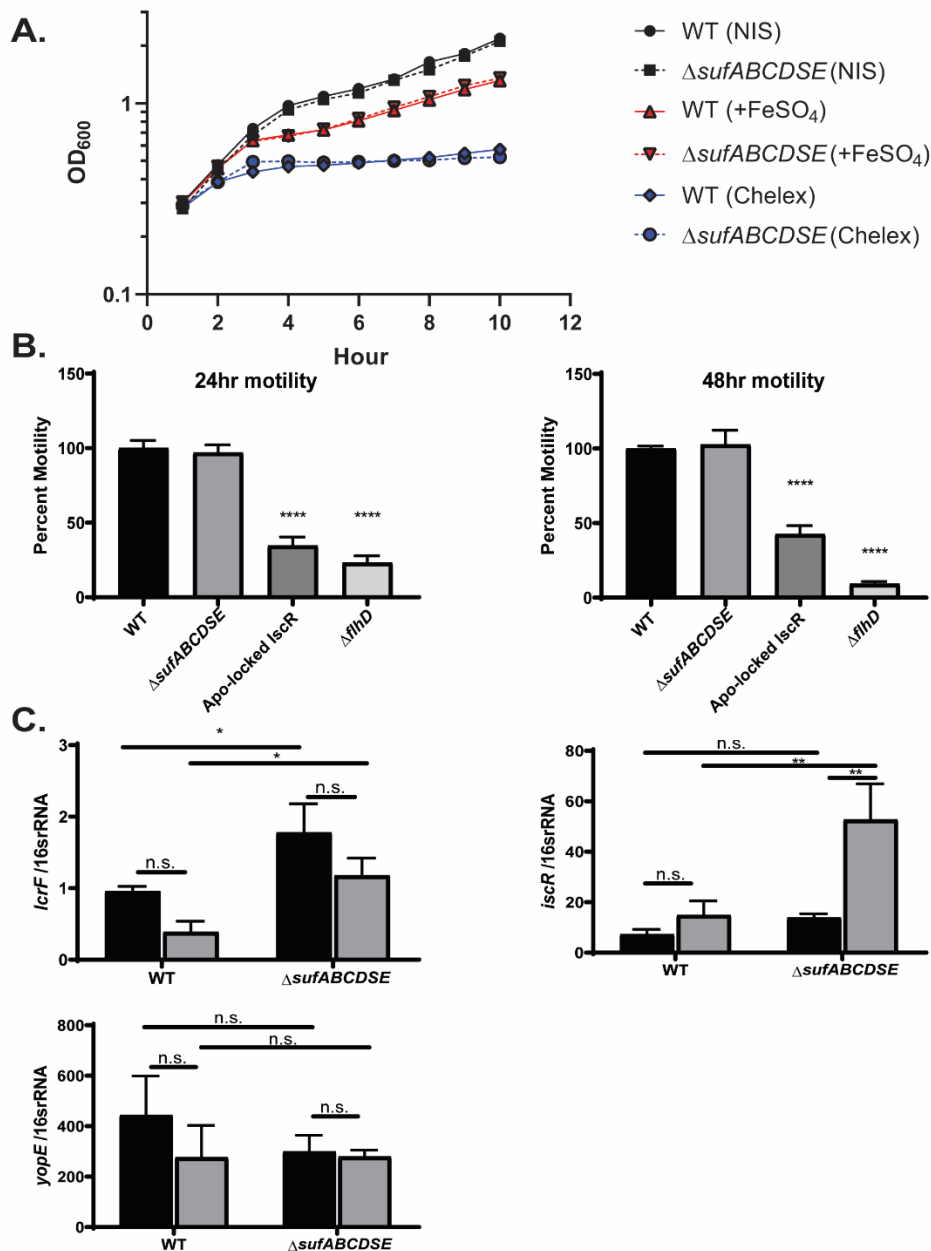

**Figure S7. The Suf pathway does not affect motility or growth. (A)** Iron starved *Y. pseudotuberculosis* were either kept in iron starved chelex-treated M9 minimal media with no iron source added back (Chelex), or supplemented with 3.6  $\mu$ M FeSO<sub>4</sub> (+FeSO<sub>4</sub>). Cultures were grown at 26°C for 10 hr and optical density at 600 nm measured every hour. Non-iron starved (NIS) samples were never exposed to chelex-treated M9. **(B)** The indicated strains were spotted onto Motility agar (1% Tryptone 0.25% Agar) and were grown at 26°C. The diameters of the colonies were measured 24 hr and 48 hr later and used to calculate percent motility. Graphs represent three biological replicates. \*\*\*\* $p$ <0.0001 (one way ANOVA with Dunnett's post-hoc test). **(C)** Expression of *IcrF*, *iscR*, *yopE*, and *sufA*, relative to 16s rRNA, following iron starved conditions in M9 minimal media at 37°C, as measured by qPCR. Black bars represent cultures which were iron starved and supplemented with 3.6  $\mu$ M FeSO<sub>4</sub> before induction of the type III secretion system, while grey bars represent cultures that received 0.036  $\mu$ M FeSO<sub>4</sub> before induction of the type III secretion system. Average of three independent experiments  $\pm$  standard deviation is shown. \*\*\* $p$ <0.001; \*\* $p$ <0.01; \* $p$ <0.05 (one way ANOVA with Dunnett's post-hoc test).
